# Supplementary material for: Elevated levels of extracellular vesicles in progranulin‐deficient mice and FTD‐GRN Patients
Source: PubMed Central journal article supplement (PMC7732244; doi:10.1002/acn3.51242), 2020-11-16
Supplement: ACN3-7-2433-s001.pdf [file ACN3-7-2433-s001.pdf]

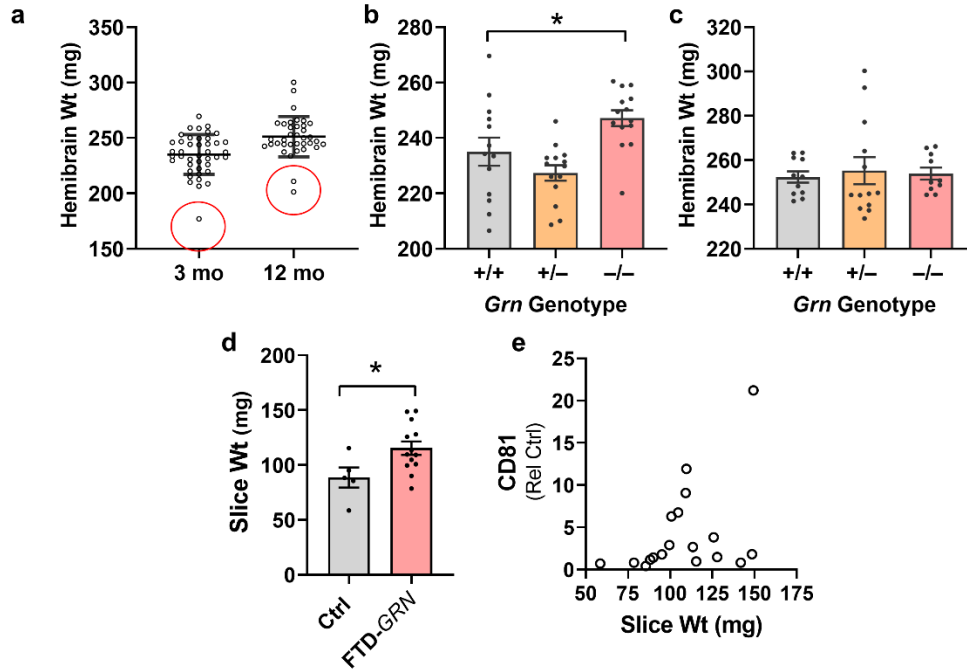

**Figure S1 – Mouse Hemibrain and Post-mortem Brain Slice Weights.**

**a**, A total of three mice (circled in red) were excluded from further analysis for being low outliers (greater than 2 standard deviations below the mean) for hemibrain weight. **b**, Among the 2–3 month-old mice, *Grn*<sup>-/-</sup> hemibrains were slightly heavier than wild-type (**b**, around 12 mg heavier on average, ANOVA effect of genotype,  $p = 0.0015$ , \* =  $p = 0.0445$  by Dunnett's post-hoc test). **c**, However, there was no genotype difference in hemibrain weight among the 12–13 month-old mice (ANOVA effect of genotype,  $p = 0.8965$ ). **d**, The weight of post-mortem tissue slices used for EV isolation also differed between controls and FTD-*GRN* patients ( $t$ -test,  $p = 0.0325$ ). **e**, However, post-mortem slice weight did not significantly correlate with uncorrected levels of CD81 in fraction 2 (Pearson correlation,  $r = 0.4077$ ,  $r^2 = 0.1662$ ,  $p = 0.0931$ ), suggesting that slice weight was not the primary factor driving group differences in EV levels.
