# Supplementary material for: Elevated levels of extracellular vesicles in progranulin‐deficient mice and FTD‐GRN Patients
Source: PubMed Central journal article supplement (PMC7732244; doi:10.1002/acn3.51242), 2020-11-16
Supplement: ACN3-7-2433-s003.pdf [file ACN3-7-2433-s003.pdf]

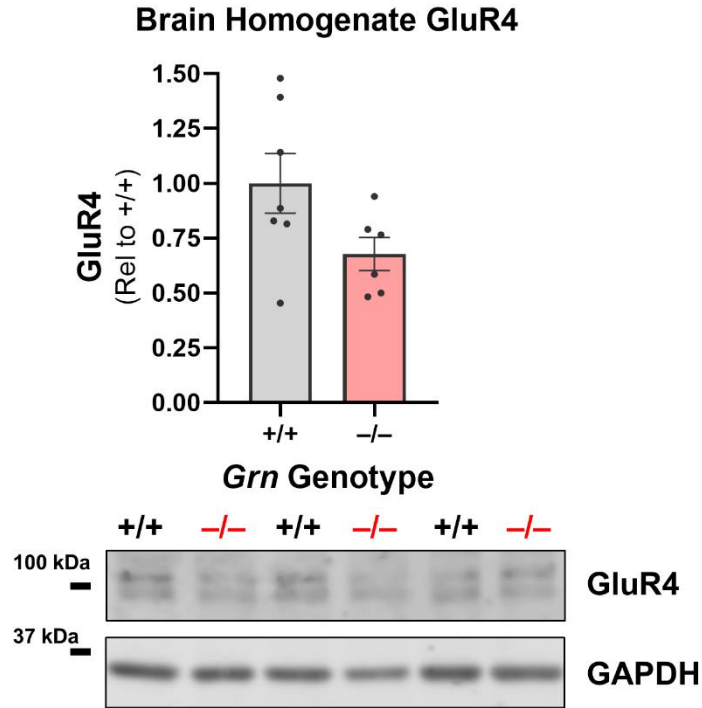

**Figure S3 – GluR4 is not Elevated in Brain Homogenates from 12–13-month-old  $Grn^{-/-}$  Mice.**

Immunoblot of brain homogenates (Fraction H from Fig. 1a) of 12–13-month-old wild-type and  $Grn^{-/-}$  mice did not reveal an elevation in total brain GluR4 as was observed in the EV fraction (Fig. 3d,e). Instead,  $Grn^{-/-}$  mice trended toward having less GluR4 than wild-type mice ( $t$ -test,  $p = 0.0738$ ).  $n = 7$  wild-type and 6  $Grn^{-/-}$  mice.
