# Supplementary material for: Elevated levels of extracellular vesicles in progranulin‐deficient mice and FTD‐GRN Patients
Source: PubMed Central journal article supplement (PMC7732244; doi:10.1002/acn3.51242), 2020-11-16
Supplement: ACN3-7-2433-s004.pdf [file ACN3-7-2433-s004.pdf]

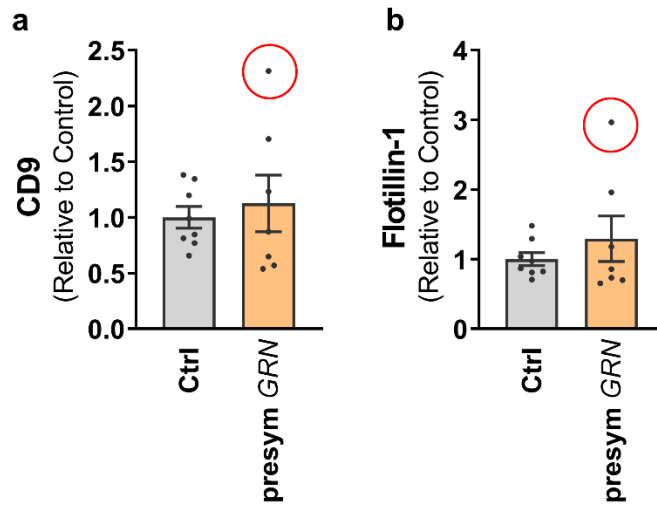

**Figure S4 – Elevated CD9 and Flotillin-1 in a *GRN* Mutation Carrier Who Subsequently Developed MCI.**

The plasma EV pellet from a clinically normal *GRN* mutation carrier who went on to develop amnesic MCI (Table 2, case 23, circled in red above) had the highest levels of CD9 (**a**) and flotillin-1 (**b**) among the presymptomatic *GRN* carriers in this study. Data are reproduced from Fig. 5e and f with symptomatic *GRN* patients excluded to better visualize the distribution of controls and presymptomatic *GRN* carriers.
